# Supplementary material for: Single Domain Antibodies as Carriers for Intracellular Drug Delivery: A Proof of Principle Study
Source: MDPI journal article supplement (doi:10.3390/biom11070927), 2021-06-22
Supplement: s1 [file s1]

# Single domain antibodies as carriers for intracellular drug delivery: a proof of principle study

Sebas D. Pronk <sup>1</sup>, Erik Schooten <sup>1</sup>, Jurgén Heinen <sup>2</sup>, Esra Helfrich <sup>2</sup>, Sabrina Oliveira <sup>2,3,\*</sup> and Paul M. P. van Bergen en Henegouwen <sup>2</sup>

<sup>1</sup> Research and Development Department, LinXis BV, Amsterdam, The Netherlands;  
[pronk@linxispharmaceuticals.com](mailto:pronk@linxispharmaceuticals.com), [schooten@linxispharmaceuticals.com](mailto:schooten@linxispharmaceuticals.com)

<sup>2</sup> Cell Biology, Neurobiology and Biophysics, Department of Biology, Science Faculty, Utrecht University, Utrecht, The Netherlands; [jurgén.heinen@student.uva.nl](mailto:jurgén.heinen@student.uva.nl); [esra.helfrich@student.hu.nl](mailto:esra.helfrich@student.hu.nl); [s.oliveira@uu.nl](mailto:s.oliveira@uu.nl); [p.vanbergen@uu.nl](mailto:p.vanbergen@uu.nl)

<sup>3</sup> Pharmaceutics, Department of Pharmaceutical Sciences, Science Faculty, Utrecht University, The Netherlands

\* Correspondence: [s.oliveira@uu.nl](mailto:s.oliveira@uu.nl); Tel.: +31 6 34103460

## Supplementary Figures and Tables Content

- Figure S1. PDGF $\beta$  receptor quantification on SCCVII-rPDGFR $\beta$  cells.
- Table S1. Calculated immune library sizes.
- Figure S2. Bacterial periplasm containing sdAbs binding to ectodomain.
- Figure S3. Monomeric sdAbs binding to ectodomain.
- Figure S4. Competition assay with 3G7-IRDye800.
- Figure S5. Purity of IRDye800 conjugated sdAbs on a SDS-PAGE gel.
- Figure S6. Serial dilutions of sdAbs binding to immobilized rat PDGFR $\beta$  ectodomain.
- Figure S7. Original blots and quantification of Figure 3.
- Figure S8. Deconvoluted mass spectra obtained upon SEC-MS analysis of the different auristatin F (AF) conjugates.
- Figure S9. Cell viability assay on SCCVII cells.

Supplementary Figures and Tables

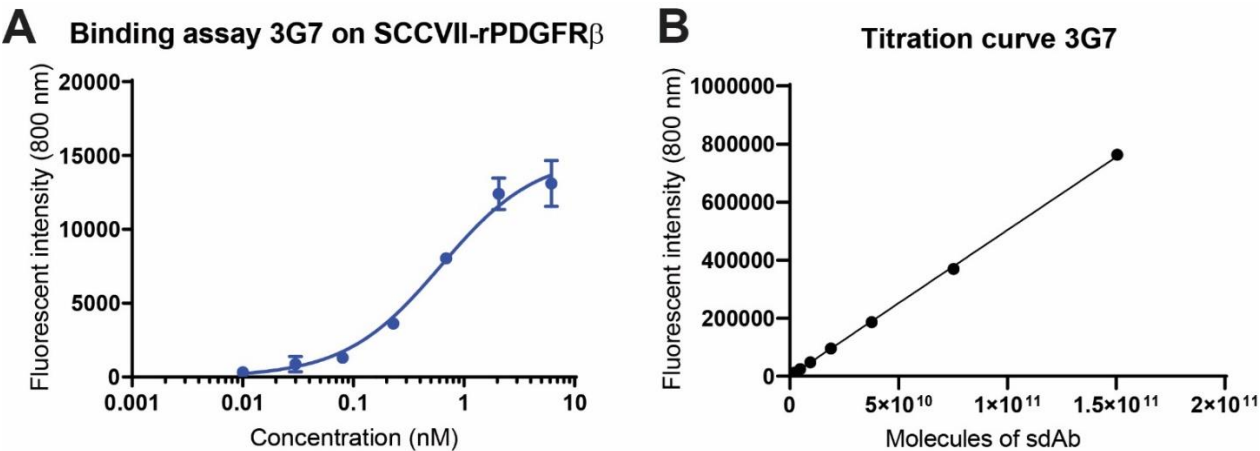

**Figure S1.** PDGF $\beta$  receptor quantification on SCCVII-PDGFR $\beta$  cells. (A). A binding assay with 3G7 conjugated to a fluorophore was performed in order to determine the  $B_{max}$ . (B). The  $B_{max}$  was then interpolated in the titration curve of 3G7 to determine the number of sdAb molecules at  $B_{max}$ .

**Table S1.** Calculated immune library sizes.

| Animal | Library | Size         |
|--------|---------|--------------|
| SNL154 | rP-154  | $9.6 * 10^6$ |
| SNL155 | rP-155  | $4.8 * 10^6$ |

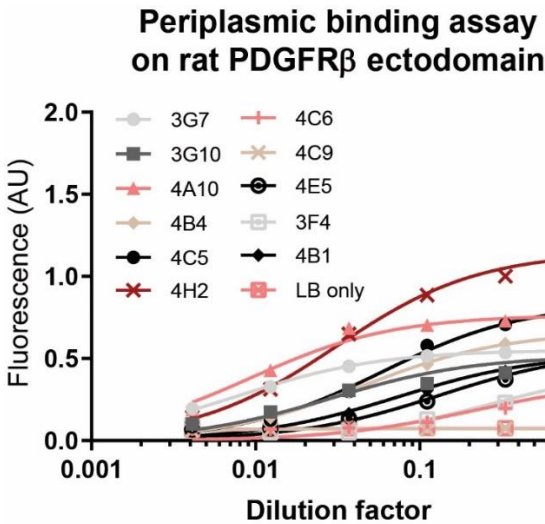

**Figure S2.** Serial dilutions of unpurified bacterial periplasm containing sdAbs binding to immobilized rat PDGFR $\beta$  ectodomain.

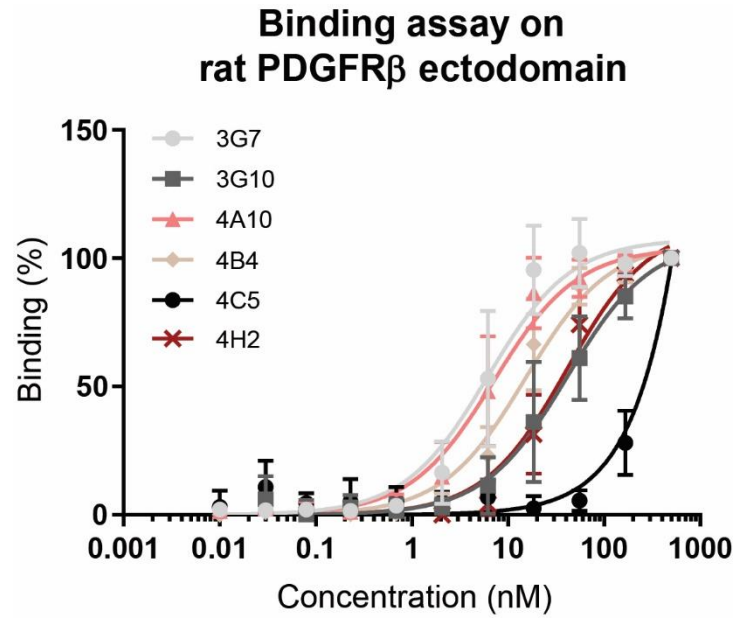

**Figure S3.** Serial dilutions of monomeric sdAbs binding to immobilized rat PDGFR $\beta$  ectodomain.

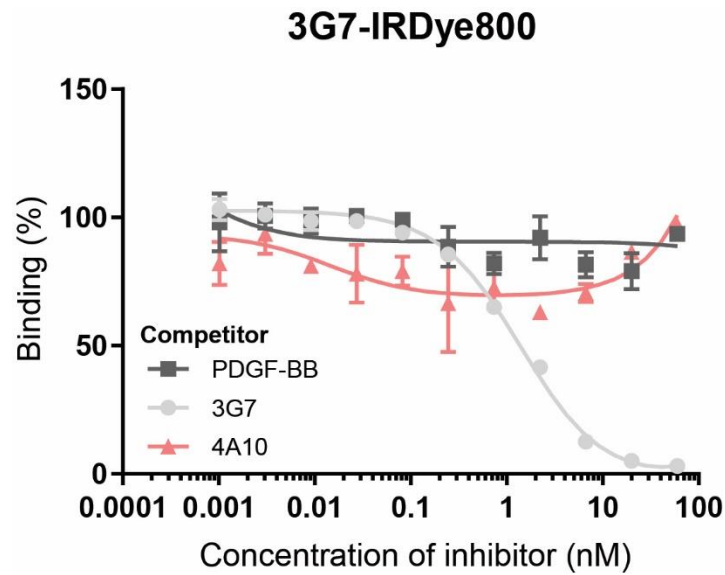

**Figure S4.** Competition assay in which 3G7 conjugated to IRDye800 (3G7-IRDye800) was incubated on immobilized rat PDGFR $\beta$ -ECD in the presence or absence of excess unconjugated competitor (3G7 or PDGF-BB).

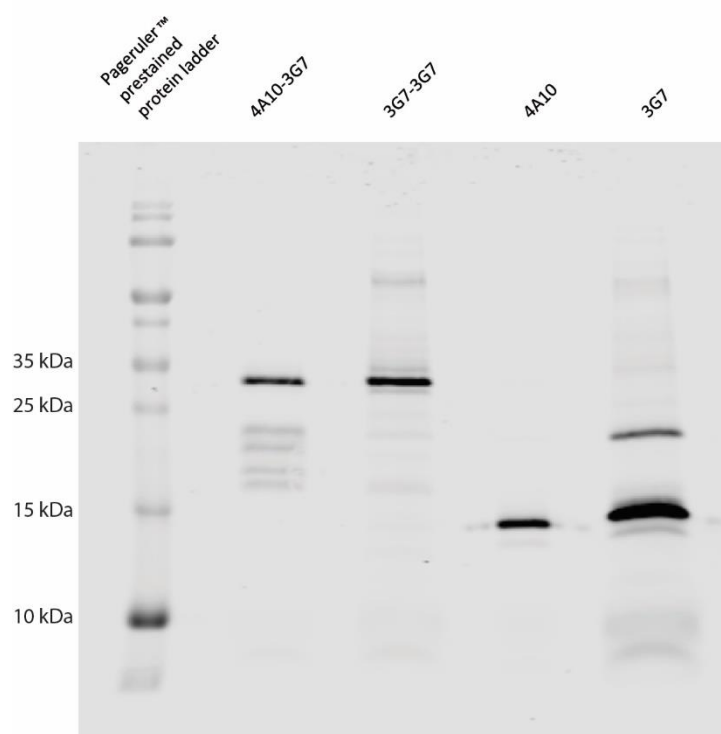

**Figure S5.** Purity of IRDye800 conjugated sdAbs on a SDS-PAGE gel. Signal shown is the IRDye800 signal.

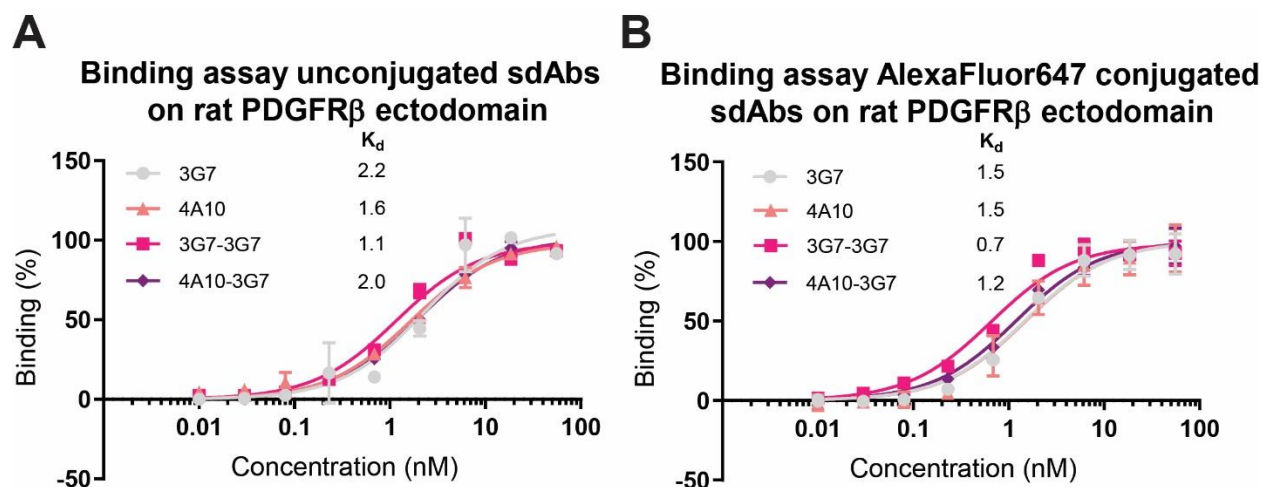

**Figure S6.** Serial dilutions of sdAbs binding to immobilized rat PDGFR $\beta$  ectodomain. (A). Binding assay of unconjugated sdAbs binding to immobilized rat PDGFR $\beta$  ectodomain detected indirectly. (B). Binding assay of AlexaFluor647 conjugated sdAbs binding to immobilized rat PDGFR $\beta$  ectodomain detected indirectly.

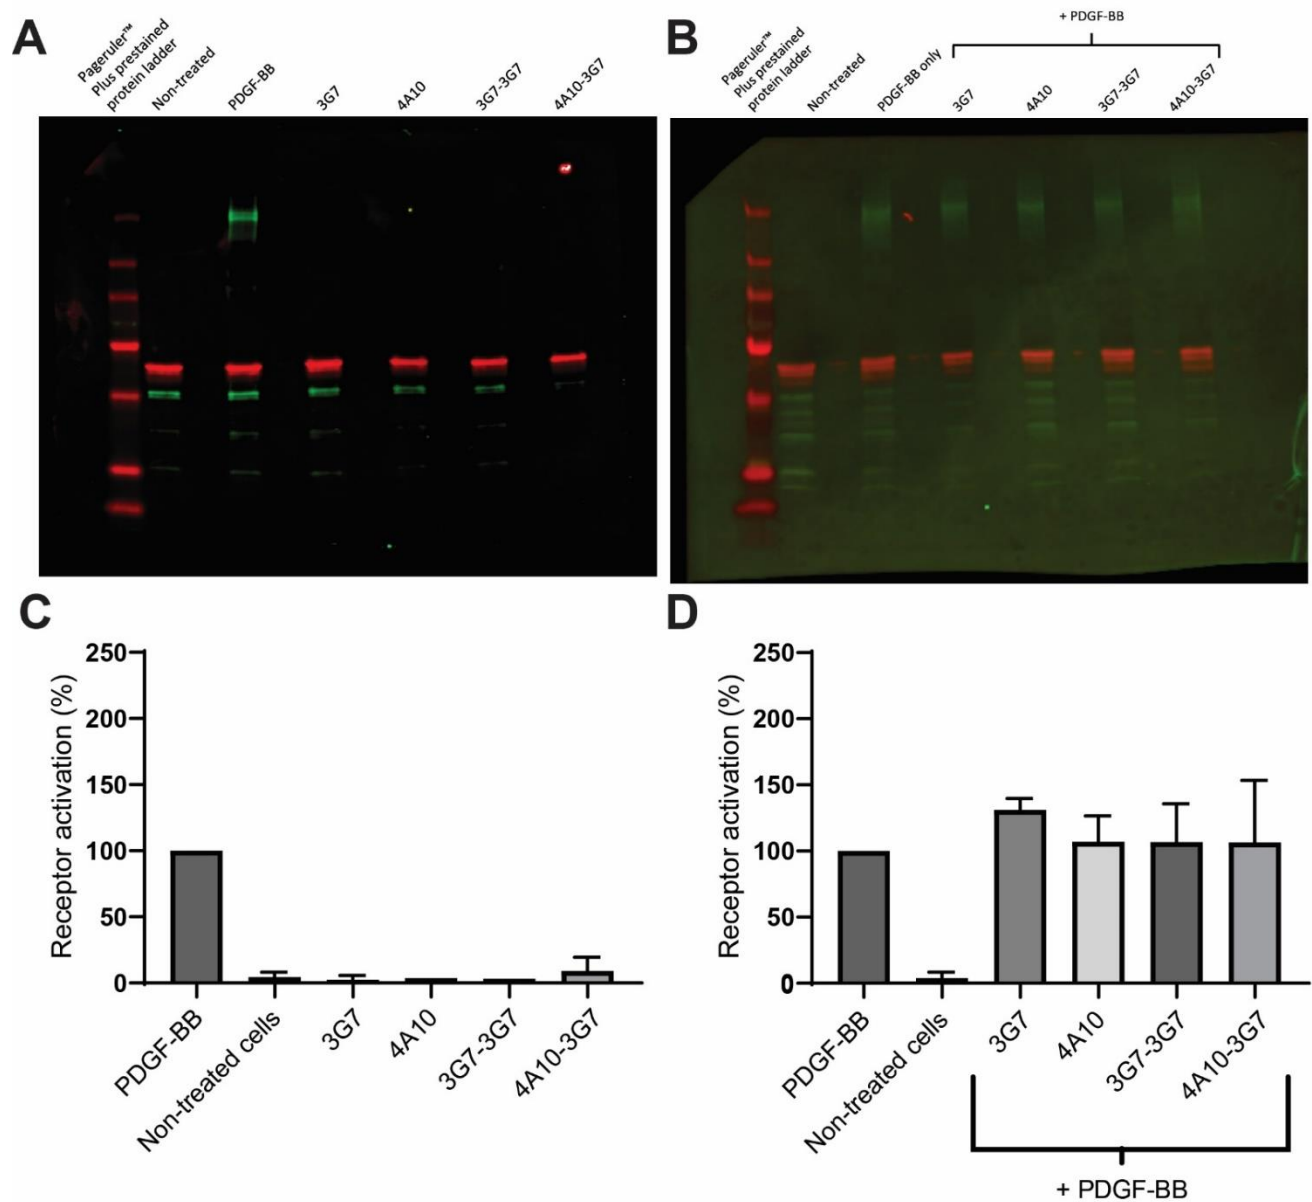

**Figure S7.** Original blots and quantification of Figure 4. Displayed in red is the IRDye700 signal (actin), and in green the IRDye800 signal (phospho-PDGFR $\beta$ ). (A). Untouched and uncropped blot of Figure 4A. (B). Untouched and uncropped blot of Figure 4B. (C). Quantification (phospho-PDGFR $\beta$  / actin) of performed activation assays. (D). Quantification (phospho-PDGFR $\beta$  / actin) of performed activation inhibition assays.

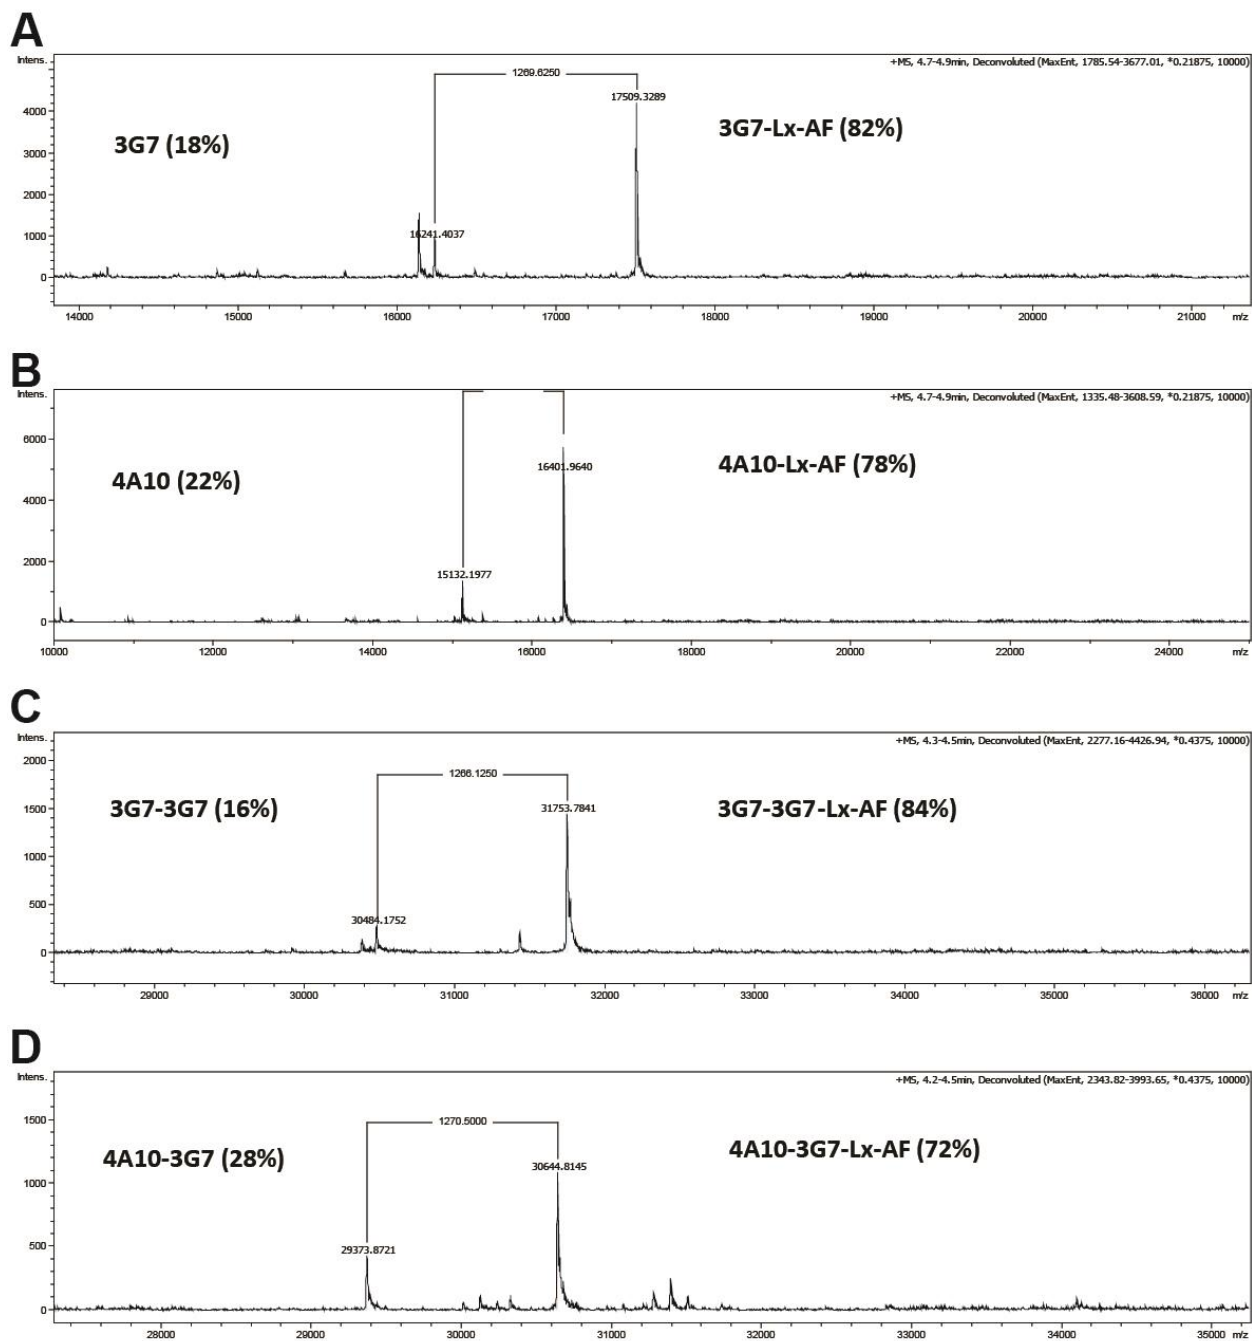

**Figure S8.** Deconvoluted mass spectra obtained upon SEC-MS analysis of the different auristatin F (AF) conjugates. (A). SEC-MS of 3G7 after conjugation to AF. (B). SEC-MS of 4A10 after conjugation to AF. (C). SEC-MS of 3G7-3G7 after conjugation to AF. (D). SEC-MS of 4A10-3G7 after conjugation to AF.

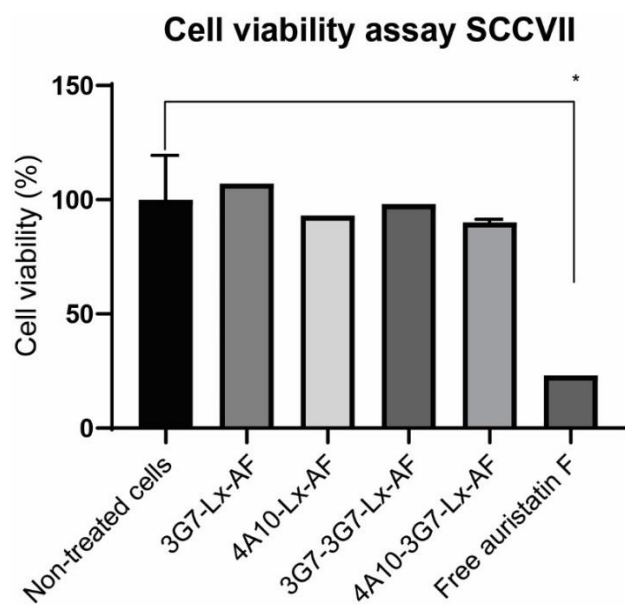

**Figure S9.** Cell viability assay on SCCVII cells. Cell viability is measured after 72 hours of treatment with 250nM conjugates or free Auristatin F. P values were determined using a one-way ANOVA test. \* =  $P \leq 0.05$  and ns = not significant.
